# Supplementary material
Source: PubMed Central journal article supplement (PMC4651167)
Supplement: NIHMS732355-supplement-Supplemental_Appendix.pdf [file NIHMS732355-supplement-Supplemental_Appendix.pdf]

**Appendix. Recommendations from the 2011 FDA Voluntary Guidance and 2009 CHPA Voluntary Guideline Categorized as Top Tier – Rationale, Examples, and Magnitude of Potential Overdose<sup>a</sup>**

| <b>Recommendation</b>                                                                              | <b>Rationale</b>                                                                                                                                    | <b>Example</b>                                                                                                                      | <b>Magnitude of Potential Overdose</b> |
|----------------------------------------------------------------------------------------------------|-----------------------------------------------------------------------------------------------------------------------------------------------------|-------------------------------------------------------------------------------------------------------------------------------------|----------------------------------------|
| Dosing devices should be included with all products                                                | A dosing device with incorrect or un-calibrated volumetric units may be used                                                                        | A kitchen tablespoon is used to dose medication rather than a teaspoon                                                              | 3-fold                                 |
| Atypical units should not be used (e.g., drams, dropperfuls)                                       | If non-standard units are used, a more familiar unit may be assumed                                                                                 | 1 teaspoon of infant acetaminophen is given rather than 1 “dropperful” <sup>b</sup>                                                 | 3-fold                                 |
| Do not use teaspoon and tablespoon units together                                                  | Teaspoon and tablespoon units may be confused when using a device or directions with both                                                           | 1 tablespoon of medication is given rather than 1 teaspoon                                                                          | 3-fold                                 |
| Do not use trailing zeros (eg., do not use 1.0; use 1)                                             | The decimal may be overlooked                                                                                                                       | 10 mL of medication is given rather than 1 mL                                                                                       | 10-fold                                |
| Always use leading zeros (e.g., use 0.5; do not use .5)                                            | The decimal may be overlooked                                                                                                                       | 5 mL of medication is given rather than 0.5 mL                                                                                      | 10-fold                                |
| Use small font used for numerals in fractions (e.g., “½” instead of “1/2”)                         | Dosing directions with fractions with numerals in the same size font with a “/” may be interpreted to mean give either the first “or” second amount | 2 teaspoons of medication is given rather than ½ teaspoon                                                                           | 4-fold                                 |
| Do not use extraneous units on the dosing device that do not correspond to units in the directions | A dose may be inadvertently measured using the extraneous units, which appear on the device                                                         | 2 teaspoons of medication are given rather than 2 mL as the dosing device has extraneous teaspoon units                             | 5-fold                                 |
| Dosing devices should not be “significantly larger” than largest recommended dose                  | A completely full dosing device may be assumed to be the largest recommended dose                                                                   | 30 mL of medication is given rather than the largest recommended dose of 10 mL because a dosing cup is filled to the rim            | 3-fold                                 |
| All doses from directions should be marked on dosing device                                        | A completely full dosing device may be assumed to be the appropriate dose if the specific numeric dose is not marked on the device                  | 30 mL of medication is given rather than the recommended dose of 7.5 mL as 7.5 mL is not marked and dosing cup is filled to the rim | 4-fold                                 |

<sup>a</sup> Top Tier recommendations are those that directly address potential ≥3-fold dosing errors. "Guidance for Industry: Dosage Delivery Devices for Orally Ingested OTC Liquid Drug Products", US Food and Drug Administration (FDA), May 2011 and "Volumetric Measures for Dosing of Over-the-Counter Oral Liquid Drug Products for Children ≤ 12 years of Age", Consumer Healthcare Products Association (CHPA), November 2009.

<sup>b</sup> Concentrated infant acetaminophen is no longer commonly available, but before 2012, concentrated infant acetaminophen product often contained a dosing dropper with a largest marked dose of 1.6 mL
